# Supplementary material for: Tumor-suppressive role of Smad ubiquitination regulatory factor 2 in patients with colorectal cancer
Source: PubMed Central journal article supplement (PMC8971512; doi:10.1038/s41598-022-09390-8), 2022-03-31
Supplement: 41598_2022_9390_MOESM1_ESM.pdf [file 41598_2022_9390_MOESM1_ESM.pdf]

# Supplementary figure 1

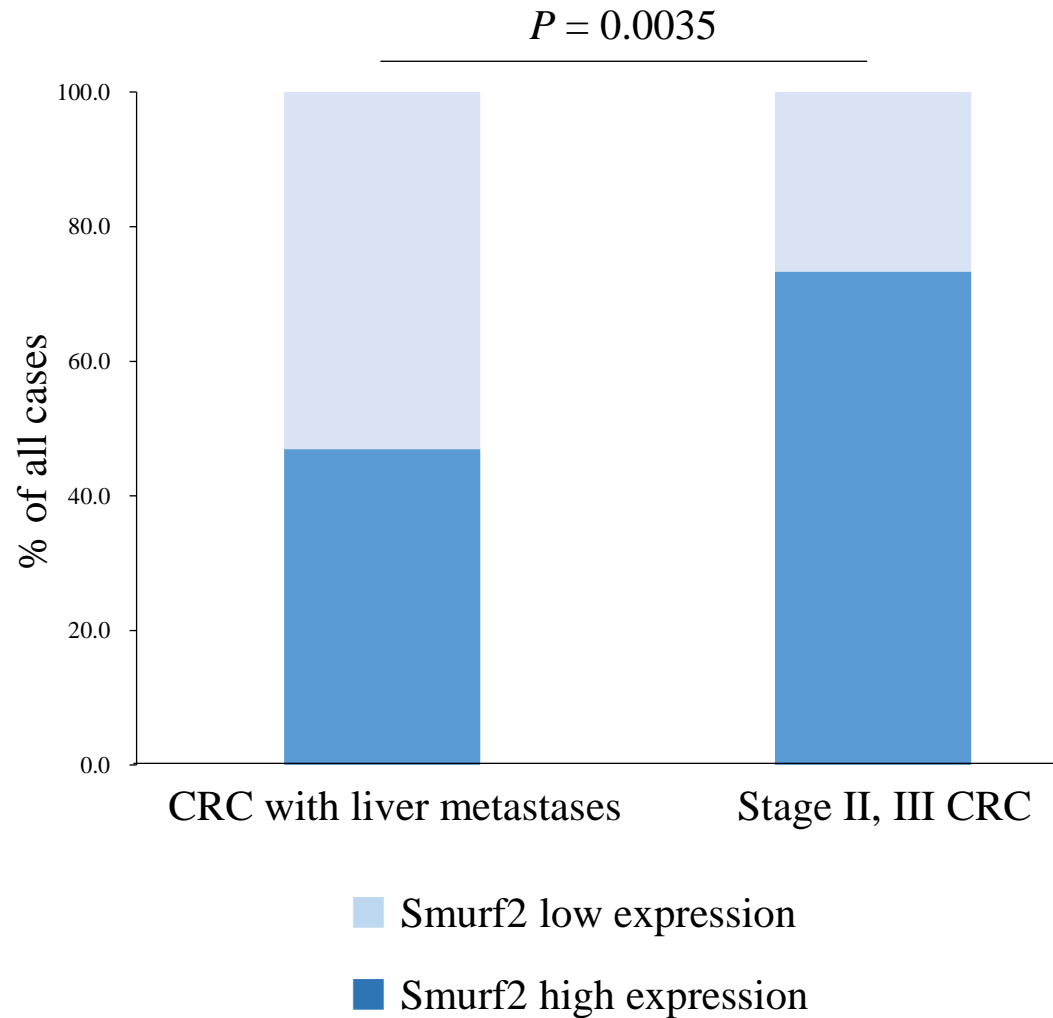

|                           | High | Low |
|---------------------------|------|-----|
| CRC with liver metastases | 31   | 35  |
| Stage II, III CRC         | 44   | 16  |

## **Smurf2 expression in CRC with liver metastases and Stage II, III CRC patients.**

The association of Smad ubiquitination regulatory factor 2 (Smurf 2) expression in colorectal cancer (CRC) patients with liver metastases and patients with stage II or III CRC.

## Supplementary figure 2

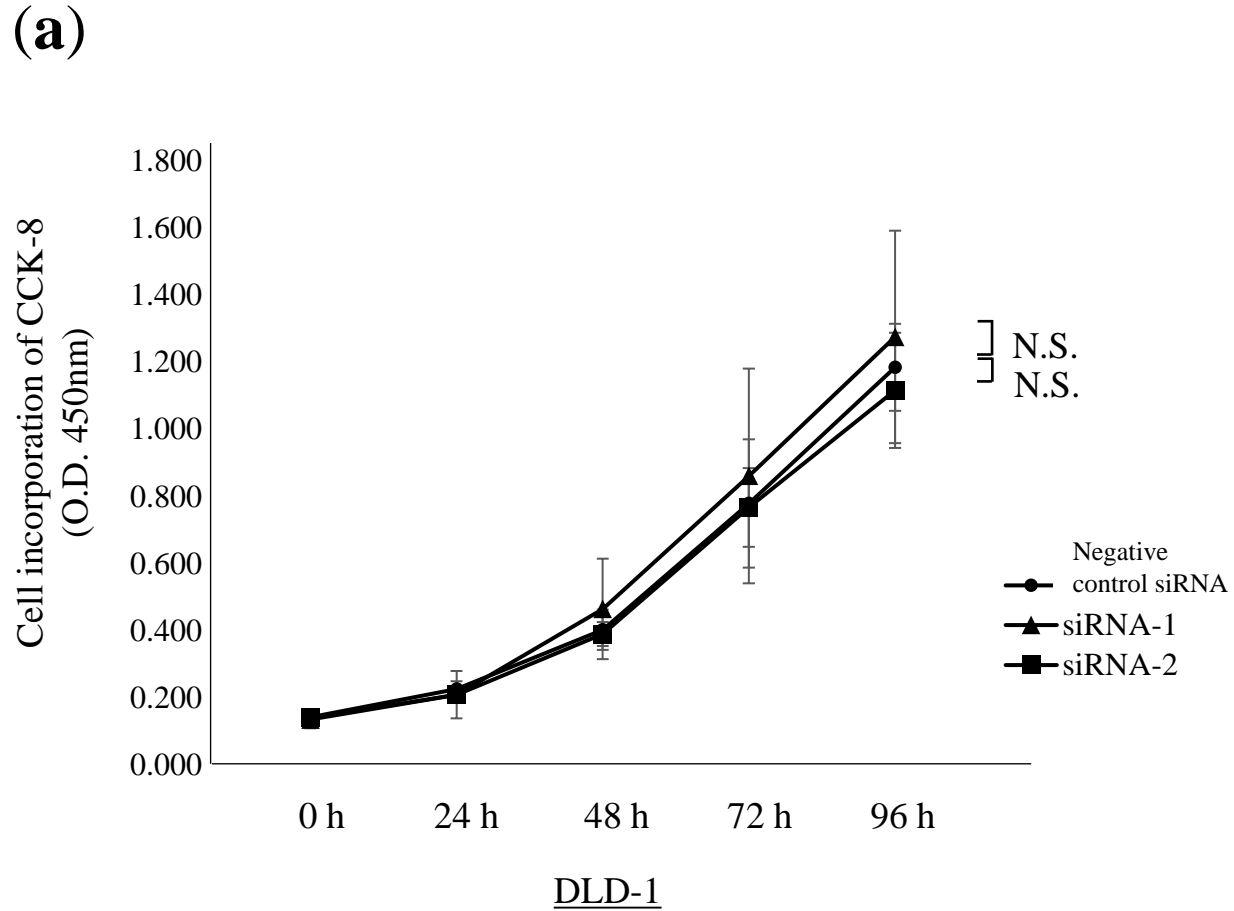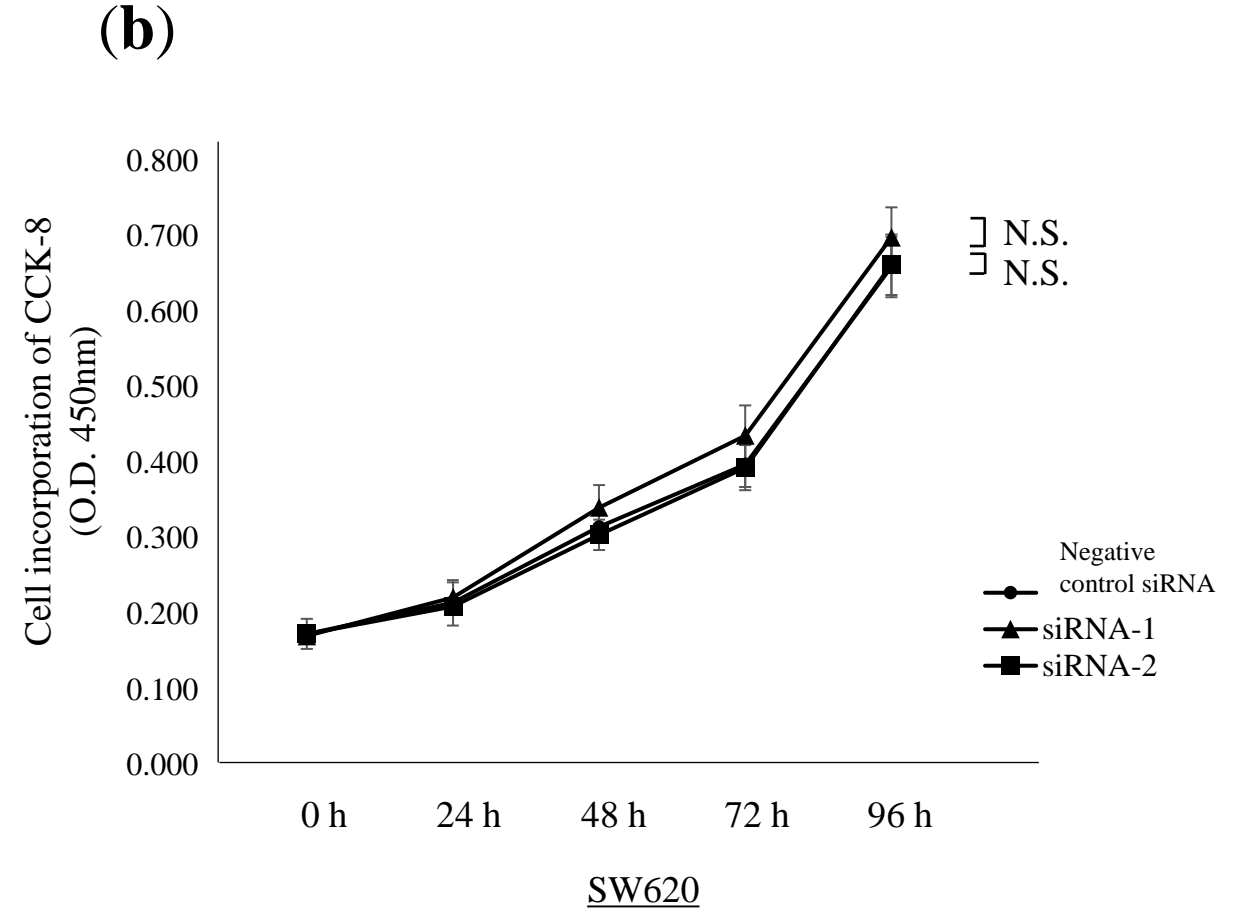

### Cell proliferation assay using the CCK-8 assay in colorectal cancer cells.

The cell proliferation properties were assessed in human colon cancer cell line, DLD-1 (a), and human colon cancer lymph node metastasis cell line, SW620 (b). Cells were treated with negative control siRNA and siSmurf2.

# Supplementary figure 3

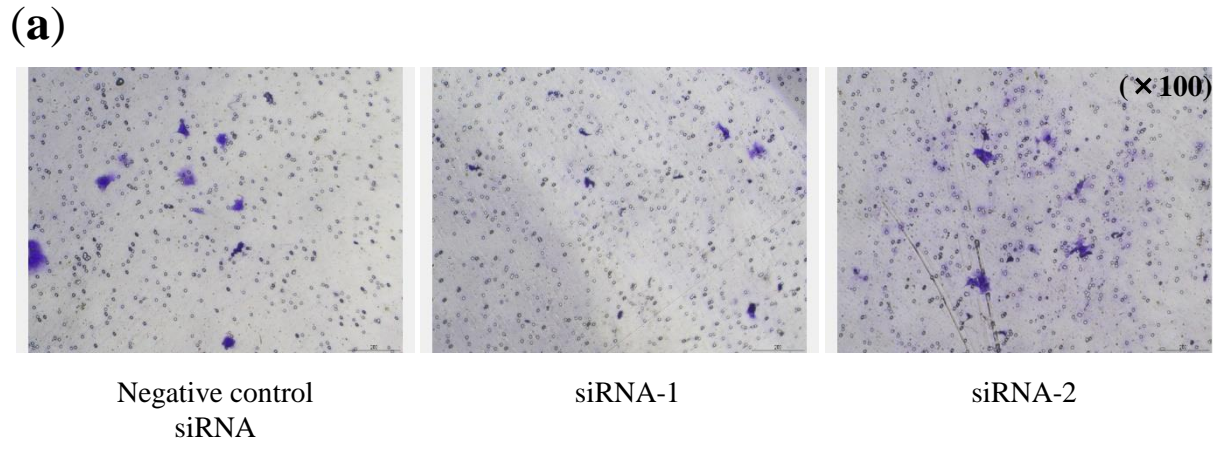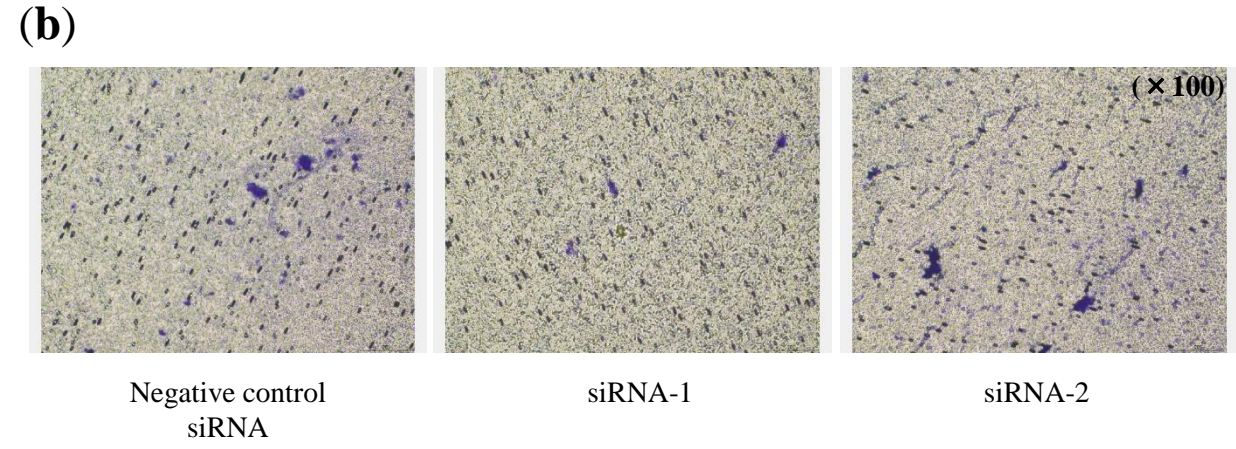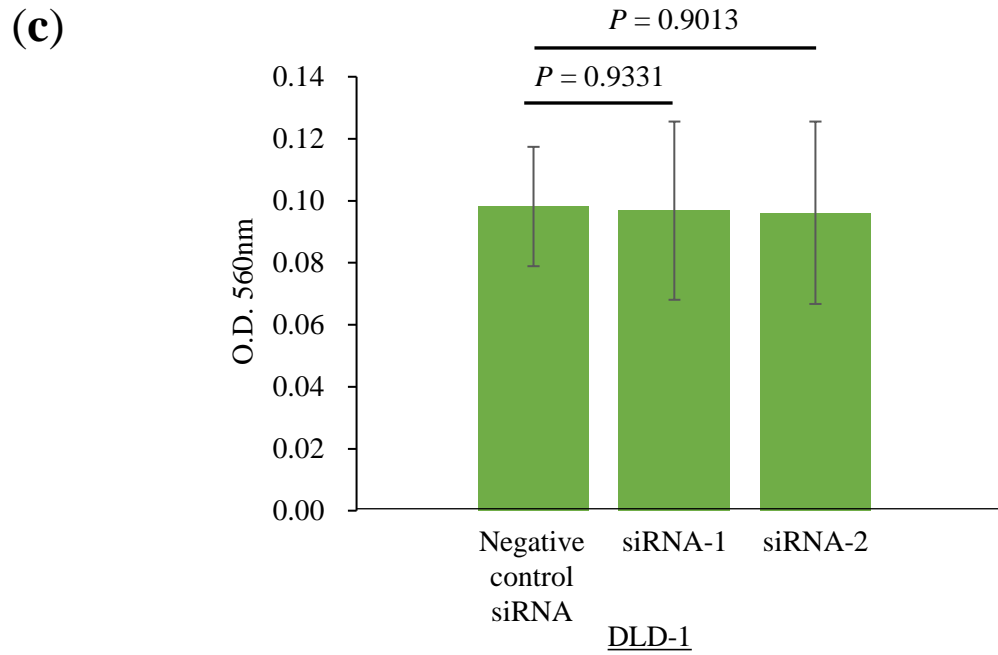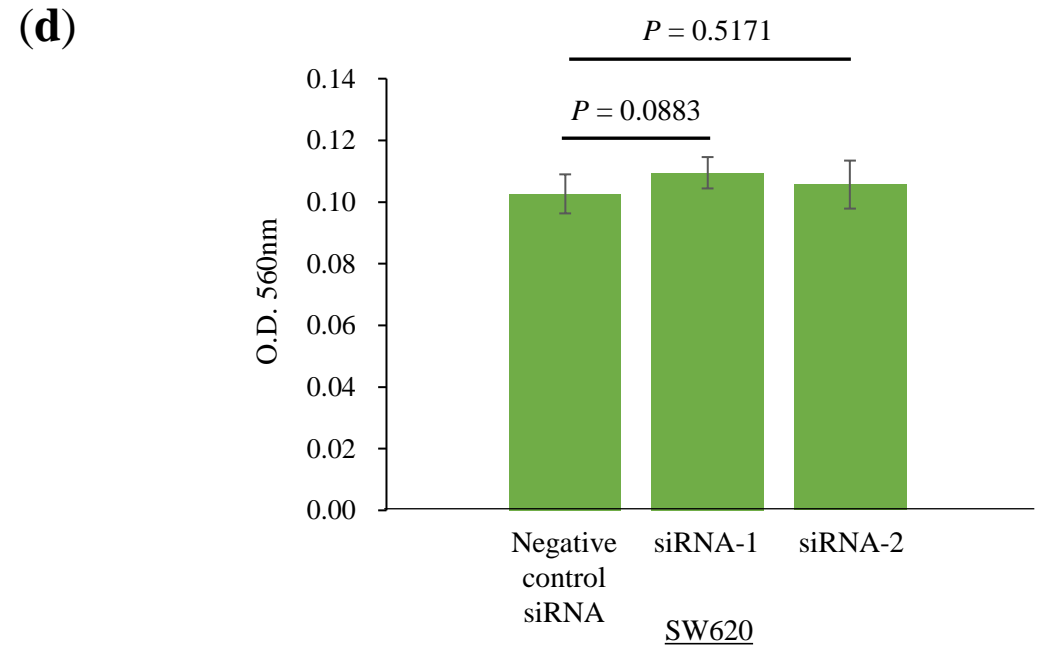

## Cell invasion assay in colorectal cancer cells.

(a, b) Representative pictures of invasion assay in DLD-1 (a) and SW620 (b) cells treated with siControl and siSmurf2. The cell invasiveness were evaluated in DLD-1 (c) and SW620 (d) cells treated with negative control siRNA and siSmurf2.

# Supplementary figure 4

## (a) Smurf2

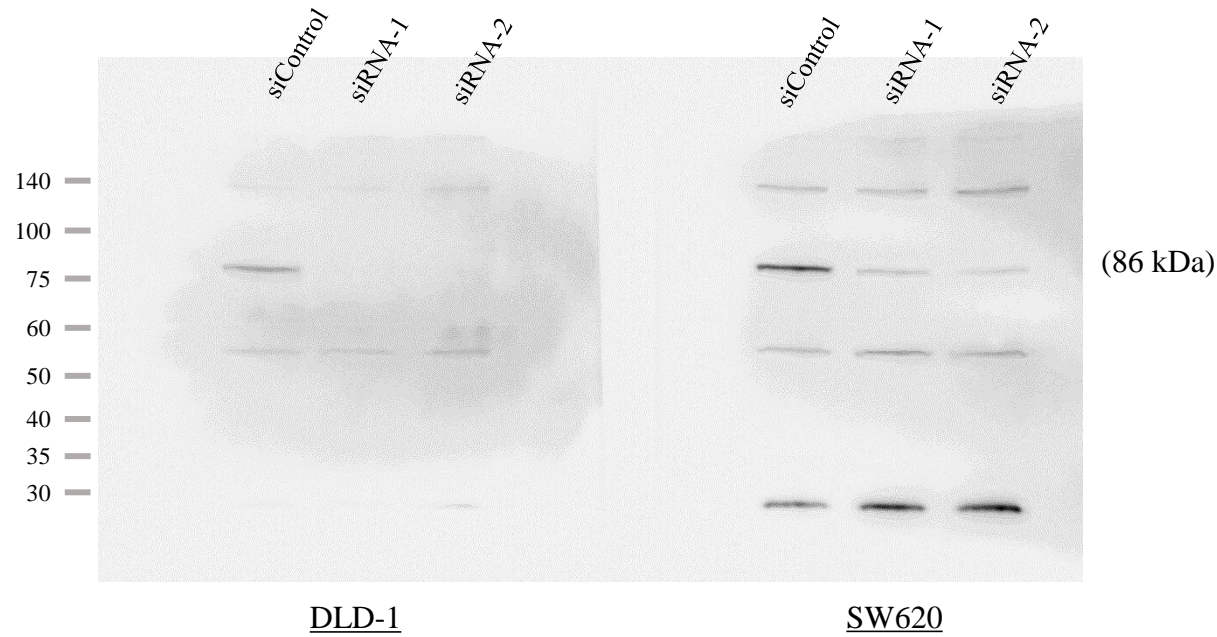

## (b) EpCAM

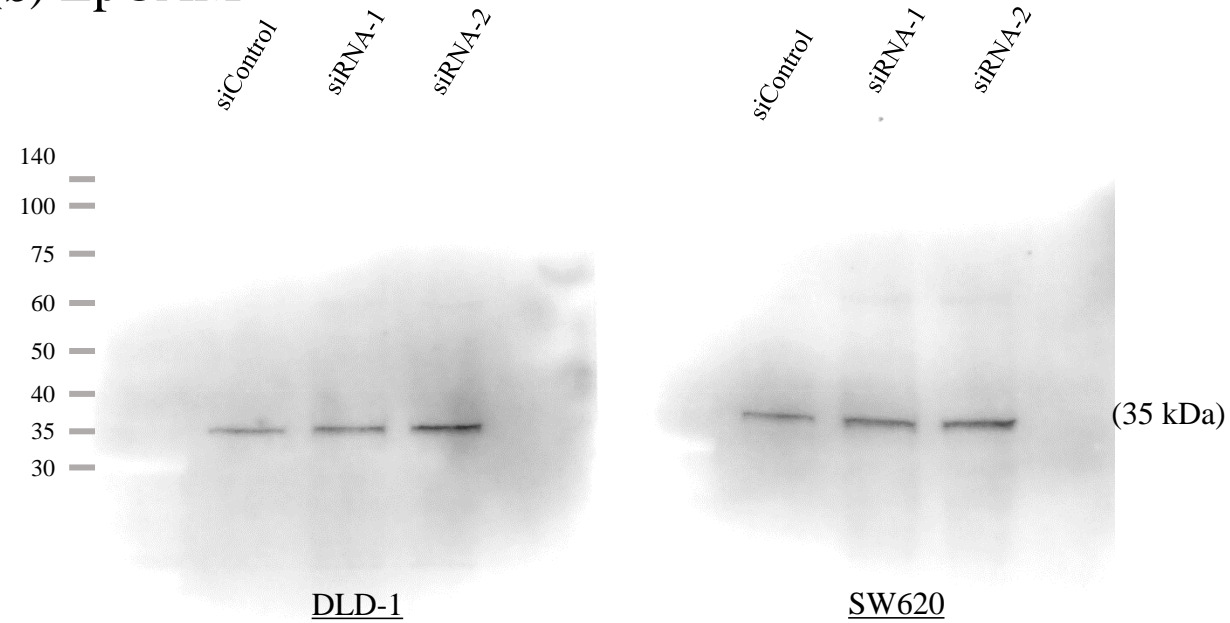

## (c) $\beta$ -actin

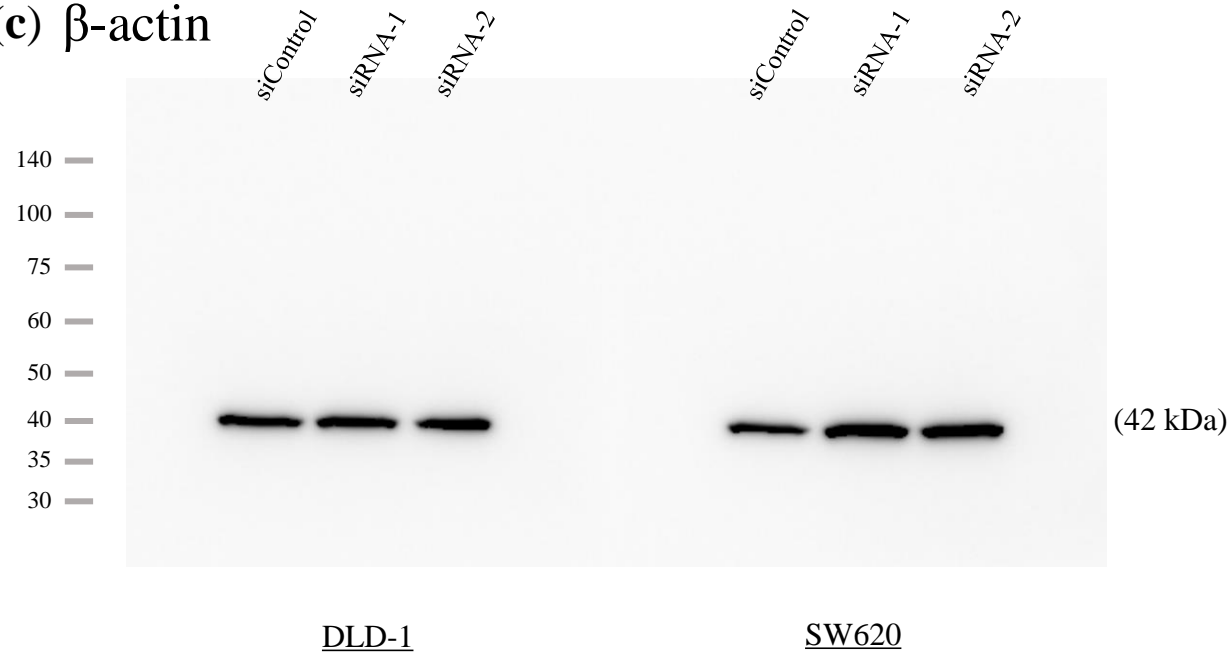

**Western blot analyses for Smad ubiquitination regulatory factor 2 (Smurf 2), epithelial cell adhesion molecule (EpCAM), and  $\beta$ -actin protein.**

Representative pictures of full-length gels and blots of Smurf2 (86kDa) (a), EpCAM (35kDa) (b) and  $\beta$ -actin (42kDa) (c). Molecular weight markers are shown at the left.
